# Supplementary material
Source: publisher site journal article supplement (https://www.dovepress.com/article/229838)
Supplement: Supplementary file 1 [file get_supplementary_file.php]

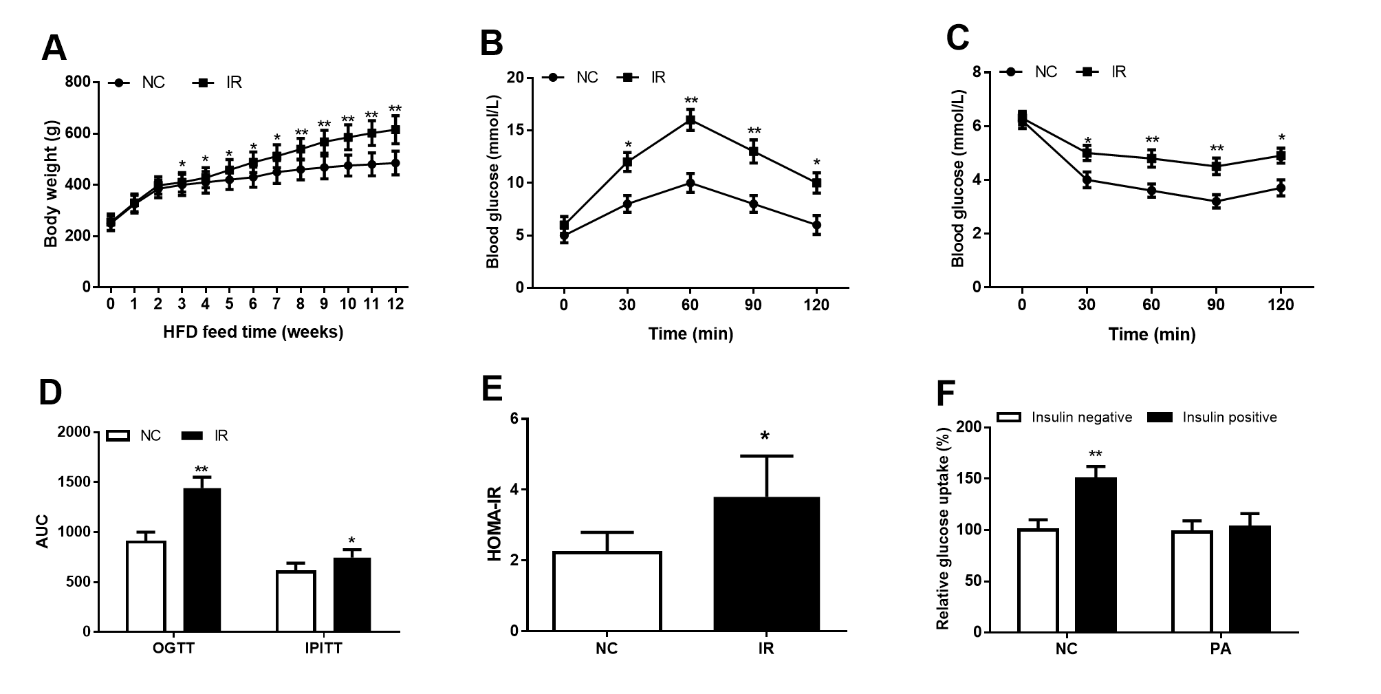


Figure S1. Obese animal model and adipocyte model with IR were successfully constructed. A. Body weight (BW) in IR animals was increased compared with the normal controls. B. Glucose tolerance was significantly impaired in the IR group. C. Insulin sensitivity was lower in the IR group compared with the control group. D. AUCs of IR group for OGTT and IPITT were all increased compared with that in the NC group. E. IR animals had higher HOMA-IR than that in the normal animals. F. The insulin stimulated glucose uptake ability was suppressed in the IR group. *P < 0.05, **P < 0.01.
